# Supplementary material for: Bifunctional intermetallic PdZn nanoparticle-loaded deficient TiO2 nanosheet electrocatalyst for electrochemical water splitting
Source: Royal Society of Chemistry journal article supplement (doi:10.1039/d2ma00904h), 2022-11-22
Supplement: d2ma00904h1.pdf [file d2ma00904h1.pdf]

## Supporting Information:

# **Bifunctional Intermetallic PdZn Nanoparticle-Loaded Deficient TiO<sub>2</sub> Nanosheet Electrocatalyst for Electrochemical Water Splitting**

Keerti M. Naik<sup>\*a</sup>, Kanaru Hashisake,<sup>a</sup> Eiji Higuchi,<sup>a</sup> Hiroshi Inoue<sup>a</sup>

Department of Applied Chemistry, Graduate School of Engineering, Osaka Metropolitan University (formerly Osaka Prefecture University), Sakai, Osaka 599-8531, Japan.

**\*Corresponding authors:**

E-mail address: [keertiraman@gmail.com](mailto:keertiraman@gmail.com) (K.M. Naik);

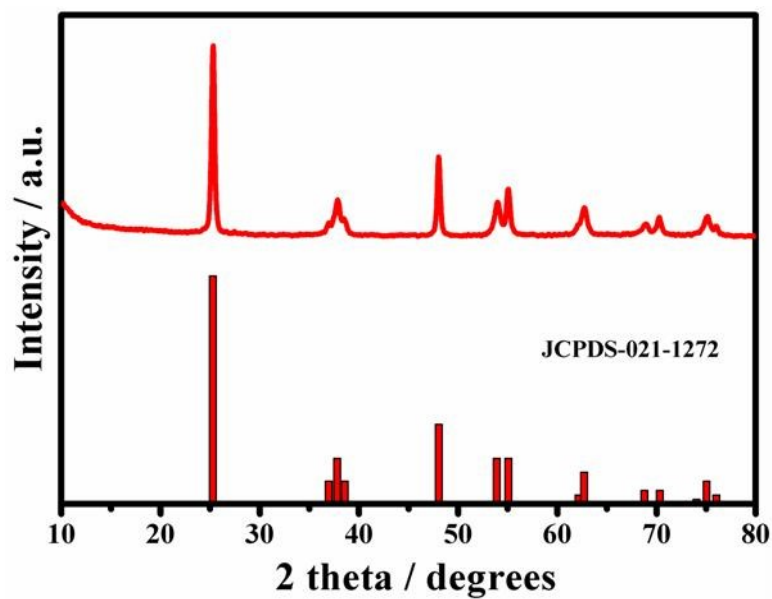

**Fig. S1.** Experimental XRD pattern of TiO<sub>2</sub> NSs and the standard XRD pattern of a-TiO<sub>2</sub> (JCPDS-021-1272).

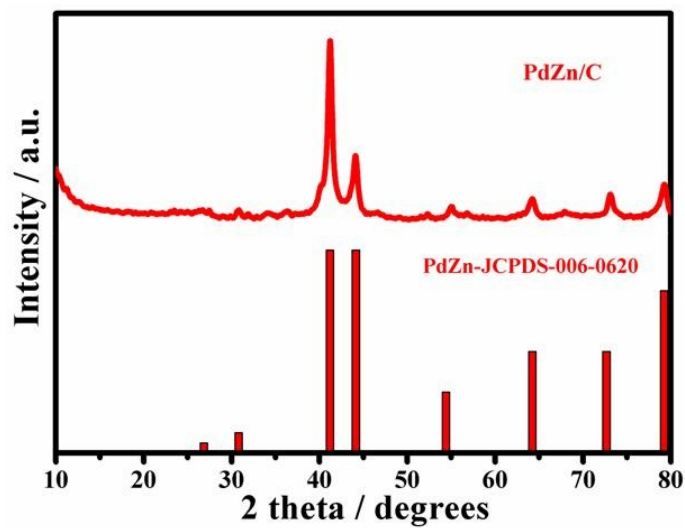

**Fig. S2.** XRD pattern of PdZn/C and the standard XRD pattern of PdZn (JCPDS-006-0620).

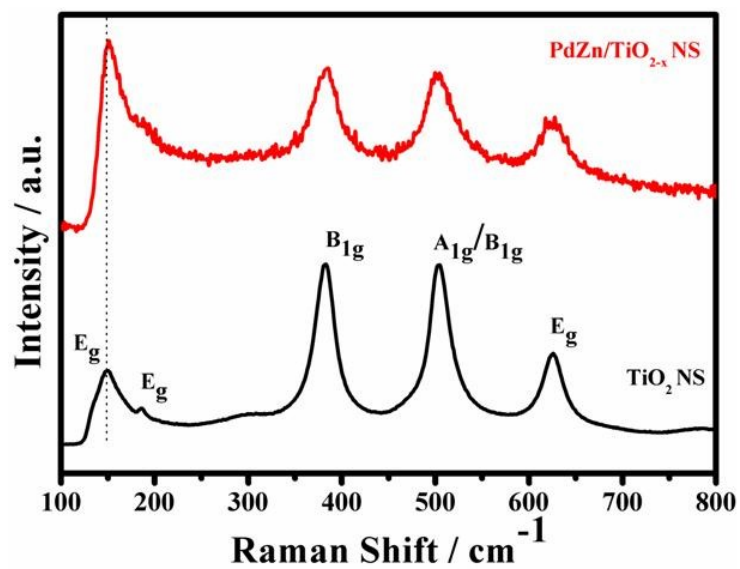

**Fig. S3.** Raman spectra of TiO<sub>2</sub> NSs and PdZn/TiO<sub>2-x</sub> NSs.

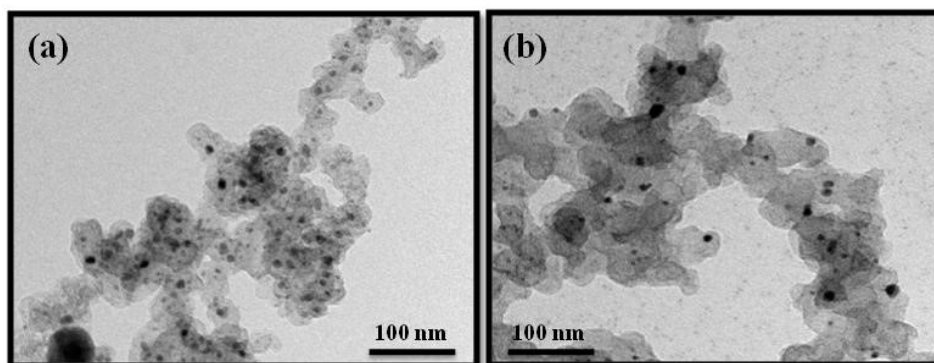

**Fig. S4.** TEM images of (a) PdZn/C and (b) Pt/C.

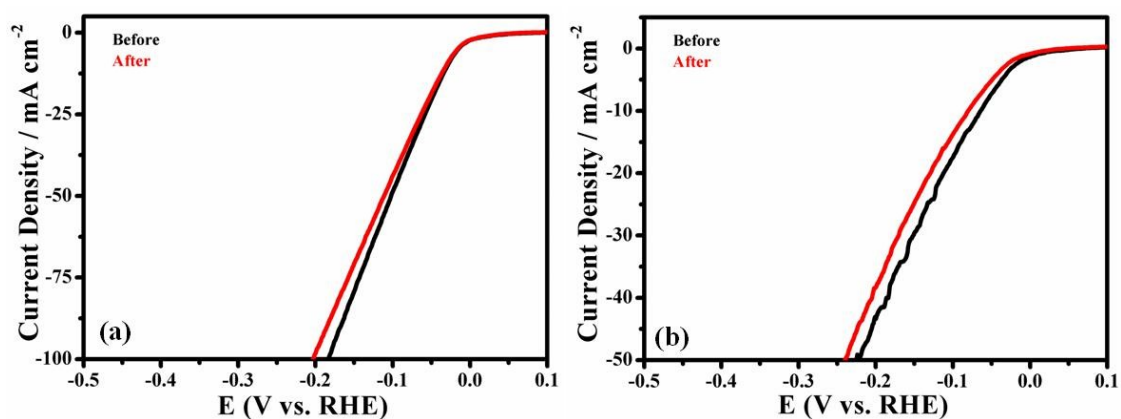

**Fig. S5.** (a) Hydrodynamic voltammograms at 1600 rpm of PdZn/TiO<sub>2-x</sub> NSs before and after potentiostatic HER measurement at -0.1 V vs. RHE in Ar-saturated (a) 0.5 M H<sub>2</sub>SO<sub>4</sub> and (b) 1 M KOH solutions at 25 °C.

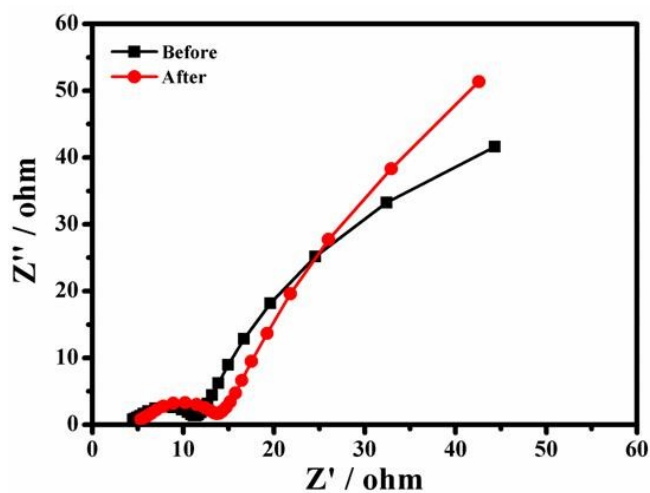

**Fig. S6.** Nyquist plots of PdZn/TiO<sub>2-x</sub> NSs at -0.05 V vs. RHE before and after potentiostatic HER measurement in an Ar-saturated 0.5 M H<sub>2</sub>SO<sub>4</sub> solution.

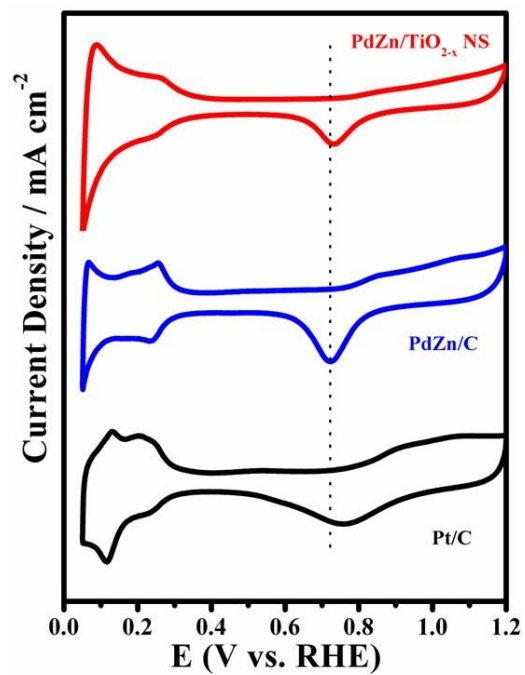

**Fig. S7.** Cyclic voltammograms of PdZn/TiO<sub>2-x</sub> NS, PdZn/C and Pt/C in Ar-saturated 0.5 M H<sub>2</sub>SO<sub>4</sub> electrolyte at a scan rate of 50 mV s<sup>-1</sup>.

**Table S1.** Comparison of the HER and OER activity for the prepared PdZn/TiO<sub>2-x</sub> NS with the reported active electrocatalysts in alkaline solution.

| <b>Catalyst</b>                                                  | <b>HER<br/>Overpotential<br/>(mV vs. RHE)</b> | <b>Tafel<br/>slope<br/>(mV<br/>Dec<sup>-1</sup> )</b> | <b>OER<br/>Overpotential<br/>(mV vs.<br/>RHE)</b> | <b>Tafel<br/>slope<br/>(mV<br/>Dec<sup>-1</sup> )</b> | <b>References</b>       |
|------------------------------------------------------------------|-----------------------------------------------|-------------------------------------------------------|---------------------------------------------------|-------------------------------------------------------|-------------------------|
| TiO <sub>2</sub> @Co <sub>9</sub> S <sub>8</sub>                 | 139                                           | 65                                                    | 240                                               | 55                                                    | [1]                     |
| NiCo <sub>2</sub> O <sub>4</sub> (2:1)/TiO <sub>2</sub>          | 185                                           | 120                                                   | 309                                               | 55                                                    | [2]                     |
| NiCo <sub>2</sub> O <sub>4</sub> /Ti <sub>4</sub> O <sub>7</sub> | 398                                           | 64                                                    | -                                                 | -                                                     | [3]                     |
| CoSCo(OH) <sub>2</sub> @aMoS <sub>2</sub><br>+ <sub>x</sub> /NF  | 143                                           | 68                                                    | 380                                               | 68                                                    | [4]                     |
| Ni <sub>0.9</sub> Fe <sub>0.1</sub> /NC                          | 231                                           | 111                                                   | 330                                               | 45                                                    | [5]                     |
| Ti <sub>3</sub> C <sub>2</sub> @mNiCoP                           | 127                                           | 103                                                   | 237                                               | 104                                                   | [6]                     |
| Co <sub>3.2</sub> Fe <sub>0.8</sub> N/MNC-100                    | 504.2                                         | 250.83                                                | 350                                               | 131                                                   | [7]                     |
| PdP <sub>2</sub> @CB                                             | 35.4                                          | 42.1                                                  | 270                                               | 78.6                                                  | [8]                     |
| <b>PdZn/TiO<sub>2-x</sub> NS</b>                                 | <b>64</b>                                     | <b>68</b>                                             | <b>460</b>                                        | <b>115</b>                                            | <b>Present<br/>work</b> |

## Notes and References

- 1 S. Deng, Y. Zhong, Y. Zeng, Y. Wang, X. Wang, X. Lu, X. Xia, J. Tu, *Adv. Sci.*, 2018, **5**, 1700772.
- 2 R. Vadakkekara, R. Illathvalappil, S. Kurungot, *ChemElectroChem* 2018, **5**, 4000-4007.
- 3 Z. Zheng, W. Geng, Y. Wang, Y. Huang, T. Qi, *Int. J. Hydrog. Energy*, 2017, **42**, 119-124.
- 4 T. Yoon, K. S. Kim, *Adv. Funct. Mater.*, 2016, **26**, 7386-7393.
- 5 X. Zhang, H. Xu, X. Li, Y. Li, T. Yang, Y. Liang, *ACS Catal.*, 2016, **6**, 580-588.
- 6 Q. Yue, J. Sun, S. Chen, Y. Zhou, H. Li, Y. Chen, R. Zhang, G. Wei, Y. Kang, *ACS Appl. Mater. Interfaces*, 2020, **12**, 18570-18577.
- 7 K. Zhang, W. Mai, J. Li, G. Li, L. Tian, W. Hu, *ACS Appl. Nano Mater.*, 2019, **2**, 5931-5941.
- 8 F. Luo, Q. Zhang, X. Yu, S. Xiao, Y. Ling, H. Hu, L. Guo, Z. Yang, L. Huang, W. Cai, H. Cheng, *Angew. Chem.*, 2018, **130**, 15078 -15083.
